# Supplementary material for: Innovative interactive flexible docking method for multi-scale reconstruction elucidates dystrophin molecular assembly
Source: Royal Society of Chemistry journal article supplement (doi:10.1039/c3fd00134b), 2014-01-01
Supplement: c3fd00134b1.pdf [file c3fd00134b1.pdf]

## Starting positions for the Attact low-resolution docking calculations

**F-actin**

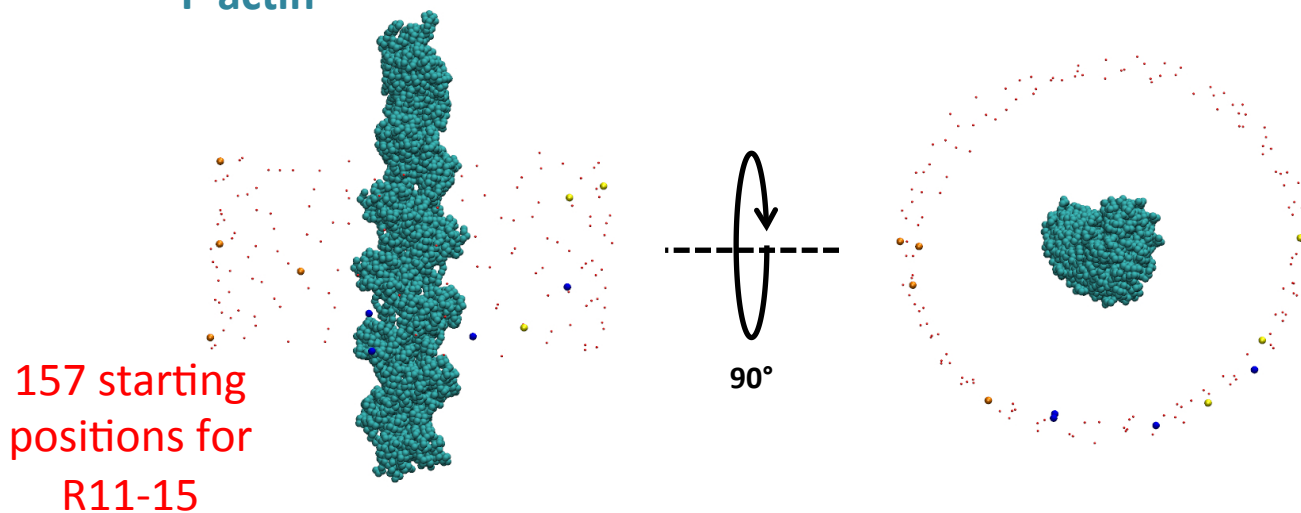

Rank for best final poses  
(preferential contact)

#1 (R14-15)

#2 (R14-15)

#3 (R11-12)

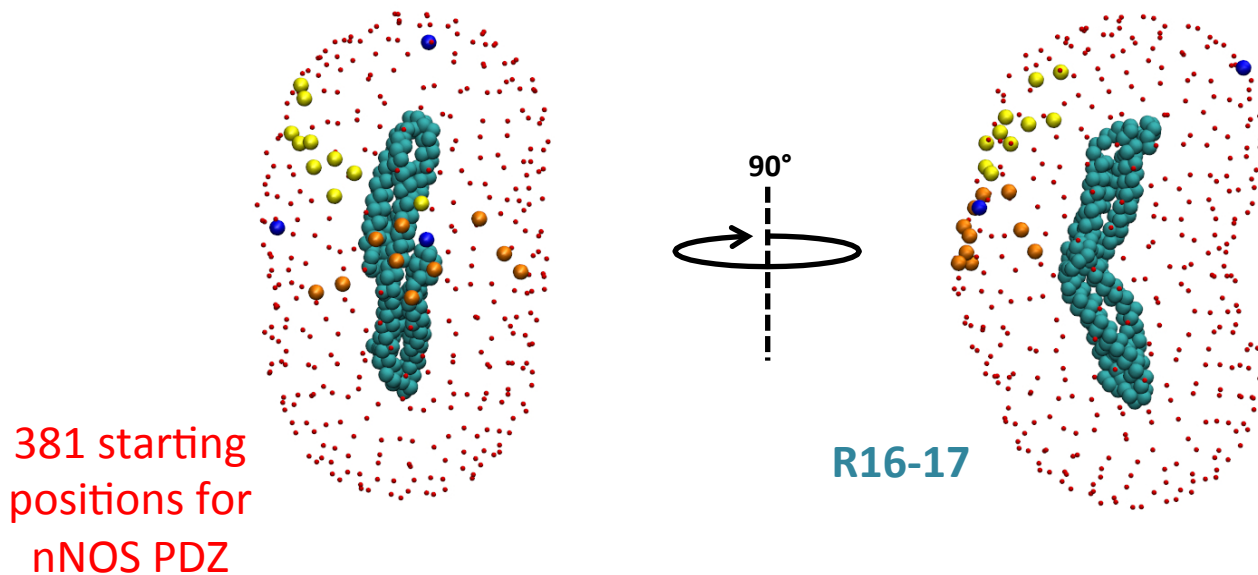

Rank for best final poses  
(native contact)

#1 (53%)

#2 (43%)

#6 (60%)

SAVES server structural analysis for the SAXS-based models

| Procheck: Ramachadran analysis |      |         |        |            | Errat %        |
|--------------------------------|------|---------|--------|------------|----------------|
| Fragment                       | Core | Allowed | Gener. | Disallowed | Quality factor |
| R11-15                         | 84.4 | 9.4     | 3.1    | 3.1        | 99.0           |
| R16-17                         | 78.4 | 15.8    | 2.7    | 3.2        | 98.2           |
